# Supplementary figures and images for: Regular Exercise and Weight-Control Behavior Are Protective Factors against Osteoporosis for General Population: A Propensity Score-Matched Analysis from Taiwan Biobank Participants
Source: MDPI journal article supplement (doi:10.3390/nu14030641), 2022-02-02

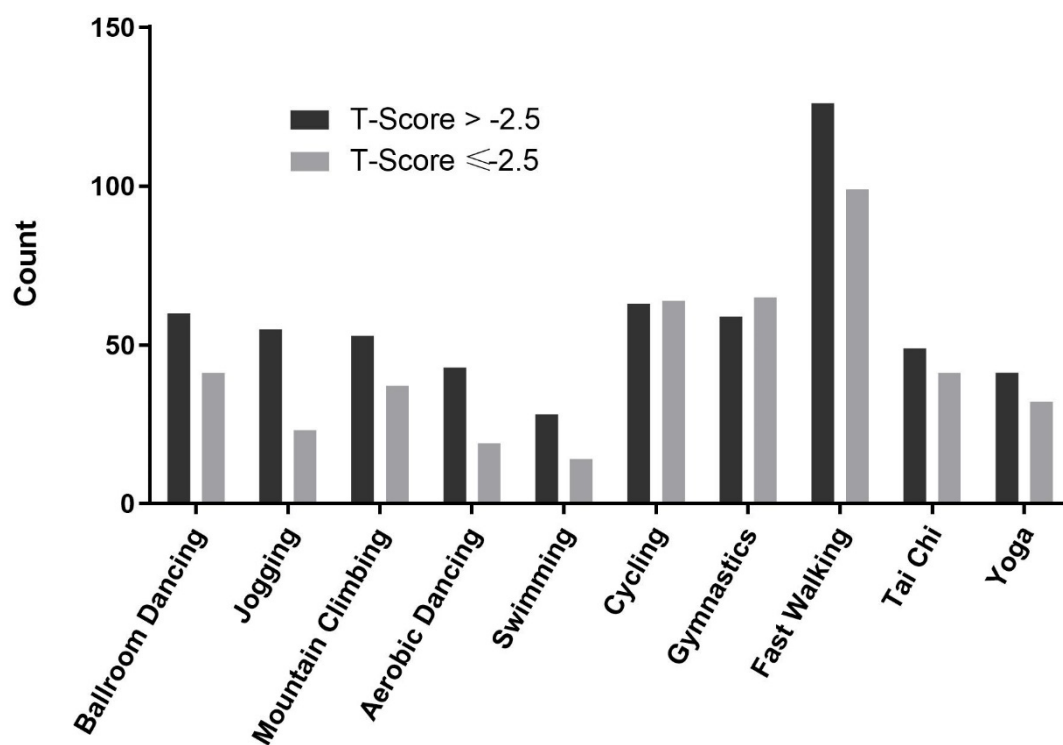

Figure S1. Count of different exercises (maximum of three exercises by each participant).

Supplement: s1 [file s1]
